# Supplementary material for: Assortative mating and gene flow generate clinal phenological variation in trees
Source: PubMed Central journal article supplement (PMC3541993; doi:10.1186/1471-2148-12-79), 2012-06-08

**Generation  $n$**

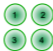

$$Z_{opt_k} + \omega_k^2$$

growth rates

+

seed migration matrix

|   | 1     | 2     | 3     | 4     |
|---|-------|-------|-------|-------|
| 1 | 0.997 | 0.001 | 0.001 | 0.001 |
| 2 | 0.001 | 0.997 | 0.001 | 0.001 |
| 3 | 0.001 | 0.001 | 0.997 | 0.001 |
| 4 | 0.001 | 0.001 | 0.001 | 0.997 |

**Individuals fitness**

+

**Populations future sizes**

+

pollen migration matrix

|   | 1    | 2    | 3    | 4    |
|---|------|------|------|------|
| 1 | 0.97 | 0.01 | 0.01 | 0.01 |
| 2 | 0.01 | 0.97 | 0.01 | 0.01 |
| 3 | 0.01 | 0.01 | 0.97 | 0.01 |
| 4 | 0.01 | 0.01 | 0.01 | 0.97 |

**Generation  $n + 1$**

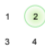

**Mates choice**

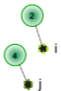

$$|Z_i - Z_j| \leq \delta$$

$$|Z_i - Z_j| > \delta$$

Zygote

**Mutations**

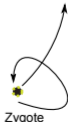

Supplement: 1471-2148-12-79-S1.pdf [file 1471-2148-12-79-S1.pdf]
