# Supplementary material for: Assortative mating and gene flow generate clinal phenological variation in trees
Source: PubMed Central journal article supplement (PMC3541993; doi:10.1186/1471-2148-12-79), 2012-06-08

$$k_E = 2$$

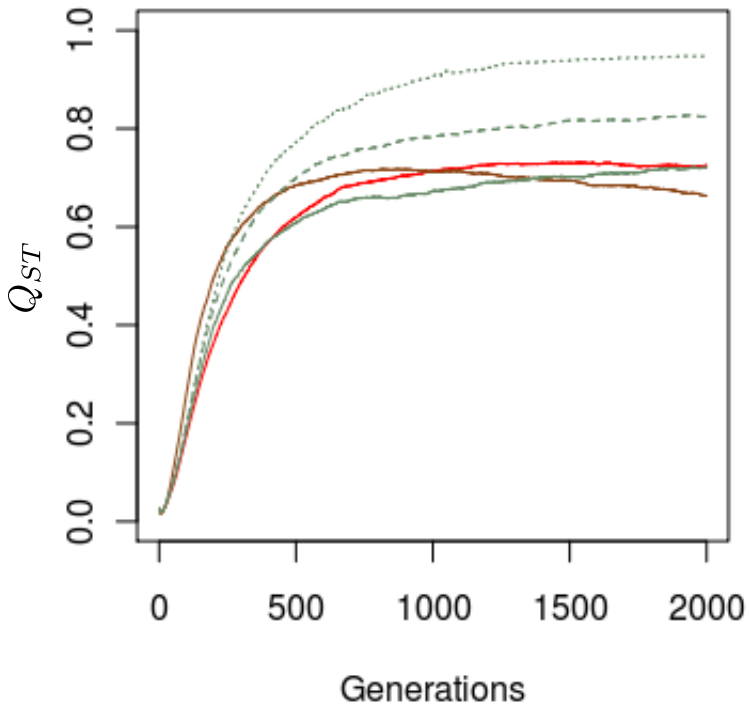

Supplement: 1471-2148-12-79-S3.pdf [file 1471-2148-12-79-S3.pdf]
